# Supplementary material for: Exploring the mechanisms of resistance to Teladorsagia circumcincta infection in sheep through transcriptome analysis of abomasal mucosa and abomasal lymph nodes
Source: Vet Res. 2018 Apr 27;49:39. doi: 10.1186/s13567-018-0534-x (PMC5922024; doi:10.1186/s13567-018-0534-x)
Supplement: Supplementary file 5 — Additional file 5. Gene-set enrichment analysis (GO) for the highly expressed genes in lymph node tissue. Significant terms from the Gene Ontology (GO) enrichment analysis performed with WebGestalt for the genes identified as highly expressed (≥ 500 FPKM) specifically in lymph node. [file 13567_2018_534_MOESM5_ESM.xlsx]

## Sheet: Additional file 5 Table S4
Database	Name	ID	Statistics **
biological process	extracellular matrix organization	GO:0030198	C=211;O=10;E=0.61;R=16.51;rawP=3.10e-10;adjP=4.42e-08
biological process	extracellular structure organization	GO:0043062	C=212;O=10;E=0.61;R=16.43;rawP=3.24e-10;adjP=4.42e-08
biological process	muscle contraction	GO:0006936	C=254;O=10;E=0.73;R=13.71;rawP=1.88e-09;adjP=1.71e-07
biological process	muscle system process	GO:0003012	C=283;O=10;E=0.81;R=12.31;rawP=5.33e-09;adjP=3.64e-07
biological process	collagen fibril organization	GO:0030199	C=37;O=5;E=0.11;R=47.07;rawP=6.21e-08;adjP=3.39e-06
biological process	single-multicellular organism process	GO:0044707	C=5612;O=33;E=16.11;R=2.05;rawP=1.21e-07;adjP=5.51e-06
biological process	multicellular organismal process	GO:0032501	C=5644;O=33;E=16.20;R=2.04;rawP=1.42e-07;adjP=5.54e-06
biological process	response to wounding	GO:0009611	C=1109;O=15;E=3.18;R=4.71;rawP=2.00e-07;adjP=6.82e-06
biological process	response to external stimulus	GO:0009605	C=1323;O=16;E=3.80;R=4.21;rawP=3.14e-07;adjP=9.52e-06
biological process	actin filament-based process	GO:0030029	C=465;O=10;E=1.33;R=7.49;rawP=5.64e-07;adjP=1.54e-05
biological process	tissue development	GO:0009888	C=1449;O=16;E=4.16;R=3.85;rawP=1.08e-06;adjP=2.46e-05
biological process	wound healing	GO:0042060	C=627;O=11;E=1.80;R=6.11;rawP=1.04e-06;adjP=2.46e-05
biological process	cytoskeleton organization	GO:0007010	C=796;O=12;E=2.29;R=5.25;rawP=1.51e-06;adjP=2.94e-05
biological process	cellular component organization at cellular level	GO:0071842	C=3317;O=24;E=9.52;R=2.52;rawP=1.43e-06;adjP=2.94e-05
biological process	cellular component organization or biogenesis at cellular level	GO:0071841	C=3420;O=24;E=9.82;R=2.44;rawP=2.55e-06;adjP=4.64e-05
biological process	response to chemical stimulus	GO:0042221	C=2746;O=21;E=7.88;R=2.66;rawP=4.64e-06;adjP=7.68e-05
biological process	cellular component organization	GO:0016043	C=4105;O=26;E=11.78;R=2.21;rawP=4.78e-06;adjP=7.68e-05
biological process	anatomical structure morphogenesis	GO:0009653	C=2055;O=18;E=5.90;R=3.05;rawP=5.11e-06;adjP=7.75e-05
biological process	response to acid	GO:0001101	C=93;O=5;E=0.27;R=18.73;rawP=6.58e-06;adjP=9.45e-05
biological process	cellular component organization or biogenesis	GO:0071840	C=4222;O=26;E=12.12;R=2.15;rawP=8.41e-06;adjP=0.0001
biological process	system process	GO:0003008	C=1695;O=16;E=4.87;R=3.29;rawP=8.54e-06;adjP=0.0001
biological process	multicellular organismal development	GO:0007275	C=4077;O=25;E=11.70;R=2.14;rawP=1.70e-05;adjP=0.0002
biological process	system development	GO:0048731	C=3521;O=23;E=10.11;R=2.28;rawP=1.82e-05;adjP=0.0002
biological process	muscle structure development	GO:0061061	C=450;O=8;E=1.29;R=6.19;rawP=3.54e-05;adjP=0.0003
biological process	organ development	GO:0048513	C=2552;O=19;E=7.33;R=2.59;rawP=2.69e-05;adjP=0.0003
biological process	response to inorganic substance	GO:0010035	C=423;O=8;E=1.21;R=6.59;rawP=2.28e-05;adjP=0.0003
biological process	cell development	GO:0048468	C=1461;O=14;E=4.19;R=3.34;rawP=3.30e-05;adjP=0.0003
biological process	single-organism process	GO:0044699	C=7682;O=35;E=22.05;R=1.59;rawP=2.92e-05;adjP=0.0003
biological process	cell differentiation	GO:0030154	C=2665;O=19;E=7.65;R=2.48;rawP=5.04e-05;adjP=0.0004
biological process	developmental process	GO:0032502	C=4572;O=26;E=13.13;R=1.98;rawP=4.02e-05;adjP=0.0004
biological process	anatomical structure development	GO:0048856	C=4030;O=24;E=11.57;R=2.07;rawP=5.17e-05;adjP=0.0004
biological process	muscle organ development	GO:0007517	C=340;O=7;E=0.98;R=7.17;rawP=4.61e-05;adjP=0.0004
biological process	axon guidance	GO:0007411	C=359;O=7;E=1.03;R=6.79;rawP=6.50e-05;adjP=0.0005
biological process	biological adhesion	GO:0022610	C=956;O=11;E=2.74;R=4.01;rawP=5.73e-05;adjP=0.0005
biological process	regulation of binding	GO:0051098	C=175;O=5;E=0.50;R=9.95;rawP=0.0001;adjP=0.0007
biological process	actin cytoskeleton organization	GO:0030036	C=409;O=7;E=1.17;R=5.96;rawP=0.0001;adjP=0.0007
biological process	cellular developmental process	GO:0048869	C=2829;O=19;E=8.12;R=2.34;rawP=0.0001;adjP=0.0007
biological process	cellular component movement	GO:0006928	C=1189;O=12;E=3.41;R=3.52;rawP=8.74e-05;adjP=0.0007
biological process	cell projection organization	GO:0030030	C=934;O=10;E=2.68;R=3.73;rawP=0.0002;adjP=0.0013
biological process	muscle tissue development	GO:0060537	C=311;O=6;E=0.89;R=6.72;rawP=0.0002;adjP=0.0013
molecular function	cytoskeletal protein binding	GO:0008092	C=638;O=13;E=1.63;R=7.99;rawP=3.09e-09;adjP=1.05e-07
molecular function	structural molecule activity	GO:0005198	C=621;O=11;E=1.58;R=6.94;rawP=2.71e-07;adjP=4.61e-06
molecular function	extracellular matrix structural constituent	GO:0005201	C=78;O=5;E=0.20;R=25.12;rawP=1.53e-06;adjP=1.73e-05
molecular function	actin binding	GO:0003779	C=356;O=8;E=0.91;R=8.81;rawP=2.62e-06;adjP=2.23e-05
molecular function	protein binding	GO:0005515	C=7337;O=31;E=18.72;R=1.66;rawP=5.46e-05;adjP=0.0004
molecular function	binding	GO:0005488	C=11955;O=37;E=30.51;R=1.21;rawP=0.0047;adjP=0.0266
cellular component	proteinaceous extracellular matrix	GO:0005578	C=360;O=12;E=0.89;R=13.53;rawP=4.08e-11;adjP=2.16e-09
cellular component	extracellular matrix	GO:0031012	C=426;O=12;E=1.05;R=11.44;rawP=2.84e-10;adjP=7.53e-09
cellular component	extracellular matrix part	GO:0044420	C=185;O=9;E=0.46;R=19.75;rawP=5.61e-10;adjP=9.91e-09
cellular component	collagen	GO:0005581	C=89;O=6;E=0.22;R=27.37;rawP=7.68e-08;adjP=1.02e-06
cellular component	contractile fiber	GO:0043292	C=162;O=7;E=0.40;R=17.54;rawP=1.25e-07;adjP=1.33e-06
cellular component	extracellular region part	GO:0044421	C=1099;O=14;E=2.71;R=5.17;rawP=1.89e-07;adjP=1.67e-06
cellular component	cytoplasmic part	GO:0044444	C=6772;O=33;E=16.68;R=1.98;rawP=3.18e-07;adjP=2.41e-06
cellular component	extracellular space	GO:0005615	C=856;O=12;E=2.11;R=5.69;rawP=6.49e-07;adjP=4.30e-06
cellular component	actin cytoskeleton	GO:0015629	C=365;O=8;E=0.90;R=8.90;rawP=2.55e-06;adjP=1.50e-05
cellular component	cytoskeleton	GO:0005856	C=1790;O=15;E=4.41;R=3.40;rawP=1.23e-05;adjP=6.52e-05
cellular component	cytosol	GO:0005829	C=2372;O=17;E=5.84;R=2.91;rawP=2.05e-05;adjP=9.88e-05
cellular component	contractile fiber part	GO:0044449	C=145;O=5;E=0.36;R=14.00;rawP=2.74e-05;adjP=0.0001
cellular component	cytoplasm	GO:0005737	C=9130;O=35;E=22.49;R=1.56;rawP=5.02e-05;adjP=0.0002
cellular component	extracellular region	GO:0005576	C=2140;O=15;E=5.27;R=2.85;rawP=0.0001;adjP=0.0004
cellular component	vesicle	GO:0031982	C=970;O=9;E=2.39;R=3.77;rawP=0.0005;adjP=0.0018
cellular component	perinuclear region of cytoplasm	GO:0048471	C=468;O=6;E=1.15;R=5.21;rawP=0.0009;adjP=0.0030
cellular component	cytoplasmic vesicle	GO:0031410	C=928;O=8;E=2.29;R=3.50;rawP=0.0017;adjP=0.0053
cellular component	intracellular organelle	GO:0043229	C=10636;O=35;E=26.20;R=1.34;rawP=0.0027;adjP=0.0078
cellular component	organelle	GO:0043226	C=10651;O=35;E=26.23;R=1.33;rawP=0.0028;adjP=0.0078
cellular component	endoplasmic reticulum	GO:0005783	C=1282;O=9;E=3.16;R=2.85;rawP=0.0035;adjP=0.0088
cellular component	cytoskeletal part	GO:0044430	C=1287;O=9;E=3.17;R=2.84;rawP=0.0035;adjP=0.0088
cellular component	cytoplasmic membrane-bounded vesicle	GO:0016023	C=862;O=7;E=2.12;R=3.30;rawP=0.0047;adjP=0.0113
cellular component	membrane-bounded vesicle	GO:0031988	C=883;O=7;E=2.17;R=3.22;rawP=0.0054;adjP=0.0124
cellular component	cell projection	GO:0042995	C=1230;O=8;E=3.03;R=2.64;rawP=0.0093;adjP=0.0205
cellular component	intracellular part	GO:0044424	C=12237;O=37;E=30.14;R=1.23;rawP=0.0102;adjP=0.0216
cellular component	non-membrane-bounded organelle	GO:0043228	C=3800;O=16;E=9.36;R=1.71;rawP=0.0148;adjP=0.0291
cellular component	intracellular non-membrane-bounded organelle	GO:0043232	C=3800;O=16;E=9.36;R=1.71;rawP=0.0148;adjP=0.0291
cellular component	intracellular	GO:0005622	C=12564;O=37;E=30.94;R=1.20;rawP=0.0198;adjP=0.0362
cellular component	cell projection part	GO:0044463	C=639;O=5;E=1.57;R=3.18;rawP=0.0197;adjP=0.0362
cellular component	Golgi apparatus part	GO:0044431	C=672;O=5;E=1.66;R=3.02;rawP=0.0239;adjP=0.0409
cellular component	Golgi apparatus	GO:0005794	C=1180;O=7;E=2.91;R=2.41;rawP=0.0239;adjP=0.0409
cellular component	cell periphery	GO:0071944	C=4377;O=17;E=10.78;R=1.58;rawP=0.0252;adjP=0.0417
** C: the number of reference genes in the category, O: the number of genes in the gene set and also in the category, E: the expected number in the category, R: ratio of enrichment, rawP: p value from hypergeometric test, adjP: p value adjusted by the multiple test adjustment
